# Supplementary material for: Aging-Accelerated Mouse Prone 8 (SAMP8) Mice Experiment and Network Pharmacological Analysis of Aged Liupao Tea Aqueous Extract in Delaying the Decline Changes of the Body
Source: MDPI journal article supplement (doi:10.3390/antiox12030685), 2023-03-10
Supplement: s1 [file s1]

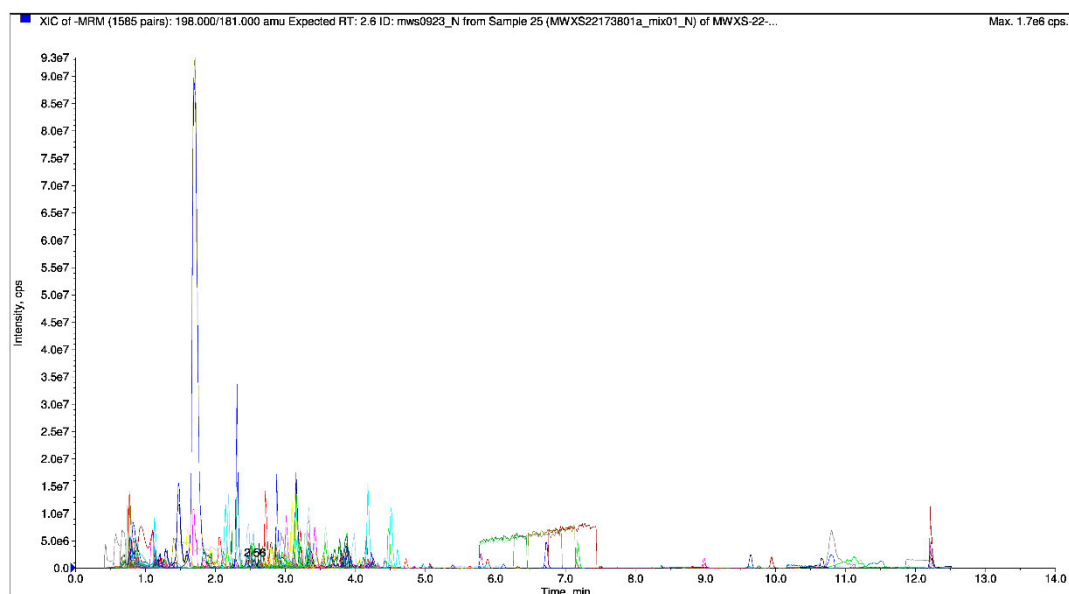

(a)

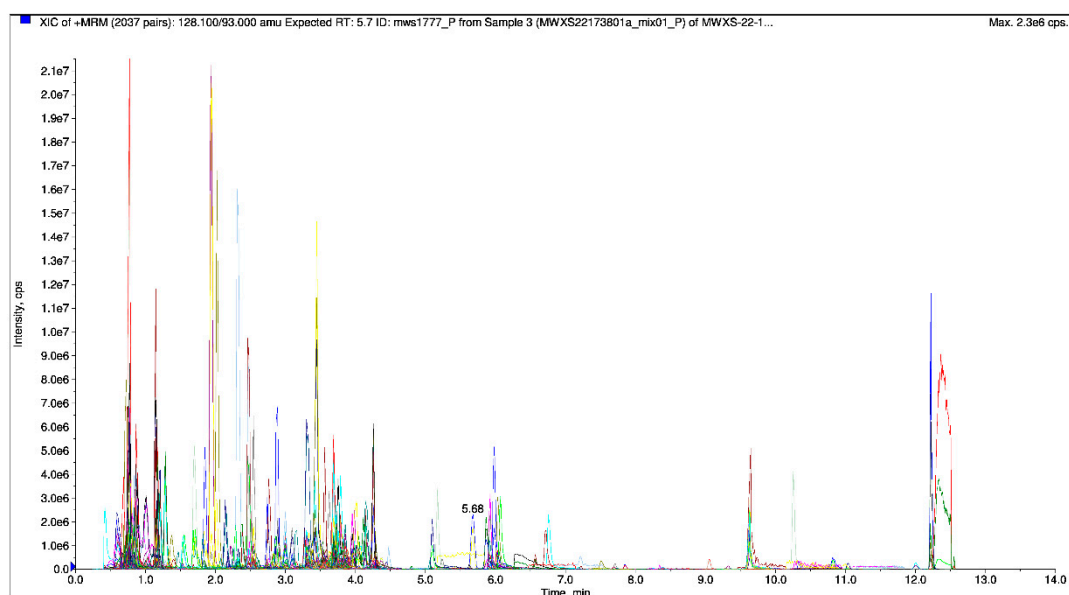

(b)

**Figure S1.** (a, b) multi-peak detection plot of metabolites in the multiple reaction monitoring mode of tea QC samples detected by mass spectrometry. Note: (a) is a negative ion mode, (b) is a positive ion mode and each mass spectrum peak with different colors represents a metabolite detected.
